# Supplementary material
Source: Elsevier journal article supplement (https://www.sciencedirect.com/science/article/pii/S0300893222000537)

## **MATERIAL ADICIONAL**

### **Listado de registros anuales revisados**

Ojeda S, Romaguera R, Cruz-González I, Moreno R. Registro Español de Hemodinámica y Cardiología Intervencionista. XXIX Informe Oficial de la Asociación de Cardiología Intervencionista de la Sociedad Española de Cardiología (1990-2019). *Rev Esp Cardiol.* 2020;73:927-936.

Cid Álvarez AB, Rodríguez Leor O, Moreno R, Pérez de Prado A. Registro Español de Hemodinámica y Cardiología Intervencionista. XXVIII Informe Oficial de la Asociación de Cardiología Intervencionista de la Sociedad Española de Cardiología (1990-2018). *Rev Esp Cardiol.* 2019;72:1043-1053.

Cid Álvarez AB, Rodríguez Leor O, Moreno R, Pérez de Prado A. Registro Español de Hemodinámica y Cardiología Intervencionista. XXVII Informe Oficial de la Asociación de Cardiología Intervencionista de la Sociedad Española de Cardiología (1990-2017). *Rev Esp Cardiol.* 2018;71:1036-1046.

Serrador Frutos AM, Jiménez-Quevedo P, Pérez de Prado A, Pan Álvarez-Ossorio M. Registro Español de Hemodinámica y Cardiología Intervencionista. XXVI Informe Oficial de la Asociación de Cardiología Intervencionista de la Sociedad Española de Cardiología (1990-2016). *Rev Esp Cardiol.* 2017;70:1110-1120.

Jiménez-Quevedo P, Serrador A, Pérez de Prado A, Pan M. Registro Español de Hemodinámica y Cardiología Intervencionista. XXV Informe Oficial de la Asociación de Cardiología Intervencionista de la Sociedad Española de Cardiología (1990-2015). *Rev Esp Cardiol.* 2016;69:1180-1189.

García Del Blanco B, Hernández Hernández F, Rumoroso Cuevas JR, Trillo Nouche R. Registro Español de Hemodinámica y Cardiología Intervencionista. XXIV Informe Oficial de la Asociación de Cardiología Intervencionista de la Sociedad Española de Cardiología (1990-2014). *Rev Esp Cardiol.* 2015;68:1154-64.

De la Torre Hernández J M, et al. *Variabilidad interregional en uso de tecnologías cardiovasculares (2011-2019). Correlación con índices económicos y frecuentación y mortalidad hospitalarias.* *Rev Esp Cardiol.* 2021

García del Blanco B, Hernández Hernández F, Rumoroso Cuevas JR, Trillo Nouche R. Registro Español de Hemodinámica y Cardiología Intervencionista. XXIII Informe Oficial de la Asociación de Cardiología Intervencionista de la Sociedad Española de Cardiología (1990-2013). *Rev Esp Cardiol.* 2014;67:1013-23.

García Del Blanco B, Rumoroso Cuevas JR, Hernández Hernández F, Trillo Nouche R. Registro Español de Hemodinámica y Cardiología Intervencionista. XXII Informe Oficial de la Asociación de Cardiología Intervencionista de la Sociedad Española de Cardiología (1990-2012). *Rev Esp Cardiol.* 2013;66:894-904.

Díaz JF, de La Torre JM, Sabaté M, Goicolea J. Registro Español de Hemodinámica y Cardiología Intervencionista. XXI Informe Oficial de la Asociación de Cardiología Intervencionista de la Sociedad Española de Cardiología (1990-2011). *Rev Esp Cardiol.* 2012 Dec;65:1106-1116.

Fernández Lozano I, Osca Asensi J, Alzueta Rodríguez J. Registro Español de Desfibrilador Automático Implantable. XVI Informe Oficial de la Sección de Electrofisiología y Arritmias de la Sociedad Española de Cardiología (2019). *Rev Esp Cardiol.* 2020;73:1026-1037.

Fernández Lozano I, Osca Asensi J, Alzueta Rodríguez J. Registro Español de Desfibrilador Automático Implantable. XV Informe Oficial de la Sección de Electrofisiología y Arritmias de la Sociedad Española de Cardiología (2018). *Rev Esp Cardiol.* 2019;72:1054-1064.

Fernández Lozano I, Osca Asensi J, Alzueta Rodríguez J. Registro Español de Desfibrilador Automático Implantable. XIV Informe Oficial de la Sección de Electrofisiología y Arritmias de la Sociedad Española de Cardiología (2017). *Rev Esp Cardiol.* 2018;71:1047-1058.

Alzueta J, Fernández-Lozano I. Registro Español de Desfibrilador Automático Implantable. XIII Informe Oficial de la Sección de Electrofisiología y Arritmias de la Sociedad Española de Cardiología (2016). *Rev Esp Cardiol.* 2017;70:960-970.

De la Torre Hernández J M, et al. *Variabilidad interregional en uso de tecnologías cardiovasculares (2011-2019). Correlación con índices económicos y frecuentación y mortalidad hospitalarias.* *Rev Esp Cardiol.* 2021

Alzueta J, Fernández-Lozano I, Barrera A. Registro Español de Desfibrilador Automático Implantable. XII Informe Oficial de la Sección de Electrofisiología y Arritmias de la Sociedad Española de Cardiología (2015). *Rev Esp Cardiol.* 2016;69:1168-1179.

Alzueta J, Asso A, Quesada A. Registro Español de Desfibrilador Automático Implantable. XI Informe Oficial de la Sección de Electrofisiología y Arritmias de la Sociedad Española de Cardiología (2014). *Rev Esp Cardiol.* 2015;68:996-1007.

Alzueta J, Pedrote A, Fernández Lozano I. Registro Español de Desfibrilador Automático Implantable. X Informe Oficial de la Sección de Electrofisiología y Arritmias de la Sociedad Española de Cardiología (2013). *Rev Esp Cardiol.* 2014;67:936-947.

Alzueta J, Fernández JM. Registro Español de Desfibrilador Automático Implantable. IX Informe Oficial de la Sección de Electrofisiología y Arritmias de la Sociedad Española de Cardiología (2012). *Rev Esp Cardiol.* 2013;66:881-893.

Alzueta J, Fernández JM. Registro Español de Desfibrilador Automático Implantable. VIII Informe Oficial de la Sección de Electrofisiología y Arritmias de la Sociedad Española de Cardiología (2011). *Rev Esp Cardiol.* 2012;65:1019-1029.

Pombo Jiménez M, Cano Pérez Ó, Chimen García J, Bertomeu-González V. Registro Español de Marcapasos. XVII Informe Oficial de la Sección de Estimulación Cardíaca de la Sociedad Española de Cardiología (2019). *Rev Esp Cardiol.* 2020;73:1038-1048.

Cano Pérez Ó, Pombo Jiménez M, Lorente Carreño D, Chimen García J. Registro Español de Marcapasos. XVI Informe Oficial de la Sección de Estimulación Cardíaca de la Sociedad Española de Cardiología (2018). *Rev Esp Cardiol.* 2019;72:944-953.

De la Torre Hernández J M, et al. *Variabilidad interregional en uso de tecnologías cardiovasculares (2011-2019). Correlación con índices económicos y frecuentación y mortalidad hospitalarias.* *Rev Esp Cardiol.* 2021

Pombo Jiménez M, Cano Pérez O, Lorente Carreño D, Chimeno García J. Registro Español de Marcapasos. XV Informe Oficial de la Sección de Estimulación Cardíaca de la Sociedad Española de Cardiología (2017). *Rev Esp Cardiol.* 2018;71:1059-1068.

Cano Pérez Ó, Pombo Jiménez M, Fidalgo Andrés ML, Lorente Carreño D, Coma Samartín R. Registro Español de Marcapasos. XIV Informe Oficial de la Sección de Estimulación Cardíaca de la Sociedad Española de Cardiología (2016). *Rev Esp Cardiol.* 2017;70:1083-1097.

Pombo Jiménez M, Cano Pérez Ó, Fidalgo Andrés ML, Lorente Carreño D, Coma Samartín R. Registro Español de Marcapasos. XIII Informe Oficial de la Sección de Estimulación Cardíaca de la Sociedad Española de Cardiología (2015). *Rev Esp Cardiol.* 2016;69:1190-1203.

Cano Pérez Ó, Pombo Jiménez M, Coma Samartín R. Registro Español de Marcapasos. XII Informe Oficial de la Sección de Estimulación Cardíaca de la Sociedad Española de Cardiología (2014). *Rev Esp Cardiol.* 2015;68:1138-1153.

Coma Samartín R, Cano Pérez Ó, Pombo Jiménez M. Registro Español de Marcapasos. XI Informe Oficial de la Sección de Estimulación Cardíaca de la Sociedad Española de Cardiología (2013). *Rev Esp Cardiol.* 2014;67:1024-1038.

29-Coma Samartín R, Ruiz Mateas F, Fidalgo Andrés ML, Leal del Ojo González J, Pérez Álvarez L. Registro Español de Marcapasos. X Informe Oficial de la Sección de Estimulación Cardíaca de la Sociedad Española de Cardiología (2012). *Rev Esp Cardiol.* 2013;66:959-972.

Coma Samartín R, Sancho-Tello de Carranza MJ, Ruiz Mateas F, Leal del Ojo González J, Fidalgo Andrés ML. Registro Español de Marcapasos. IX Informe Oficial de la Sección de Estimulación Cardíaca de la Sociedad Española de Cardiología (2011). *Rev Esp Cardiol.* 2012;65:1117-32.

**Figura 1 del material adicional.** Coronariografías por millón de habitantes/trienio en los distintos periodos temporales.

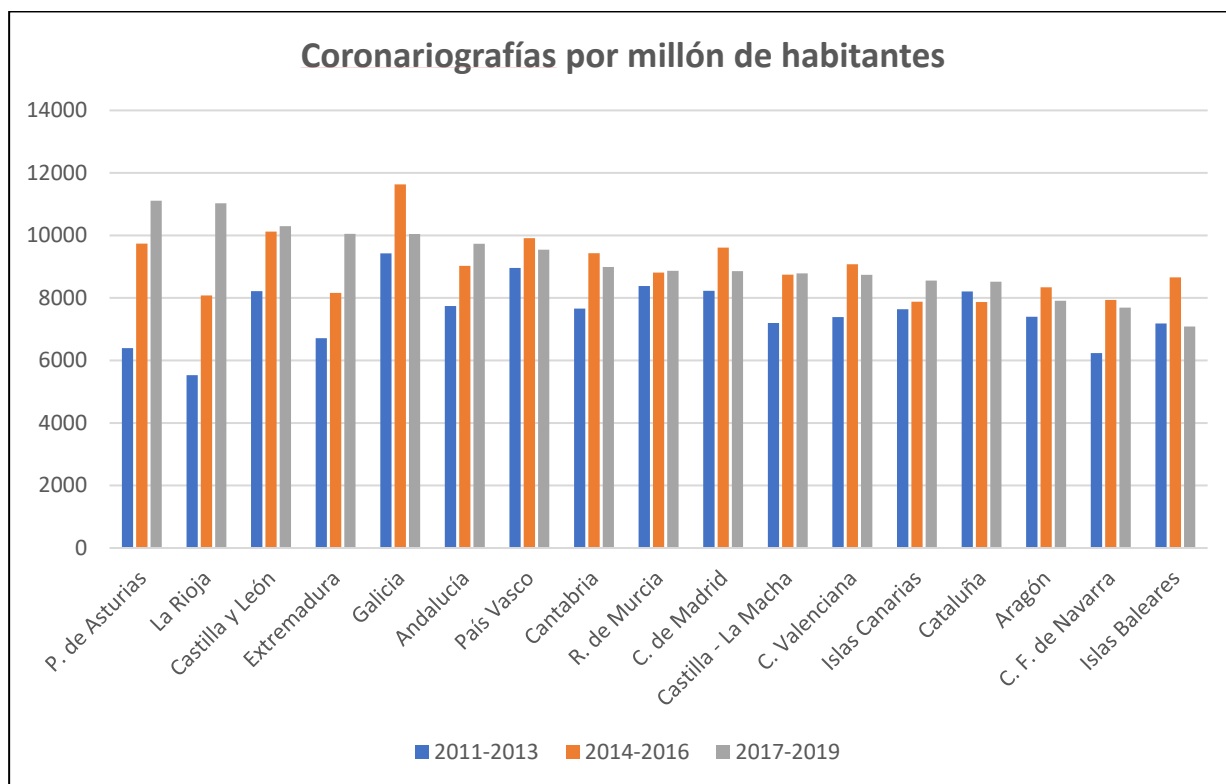

**Figura 2 del material adicional.** Intervenciones coronarias percutáneas (ICP) por millón de habitantes/trienio en los distintos periodos temporales.

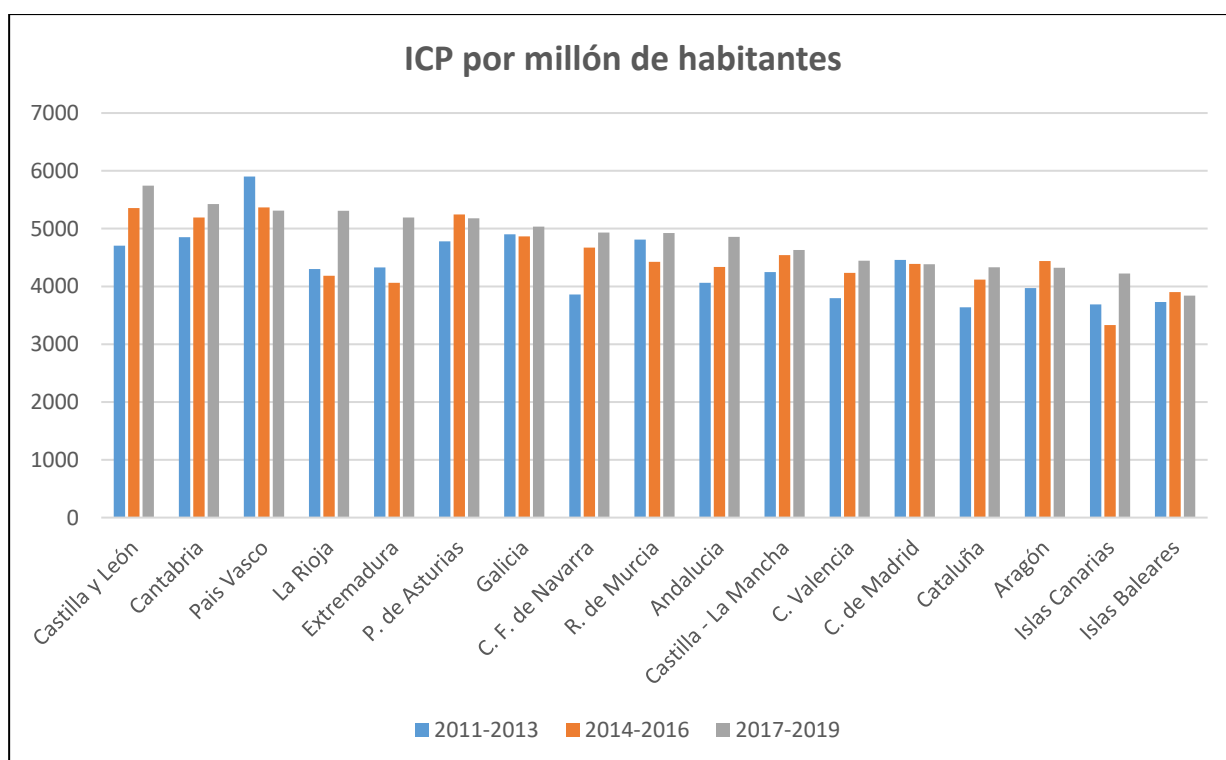

**Figura 3 del material adicional.** Intervenciones coronarias percutáneas (ICP) primarias por millón de habitantes/trienio en los distintos periodos temporales.

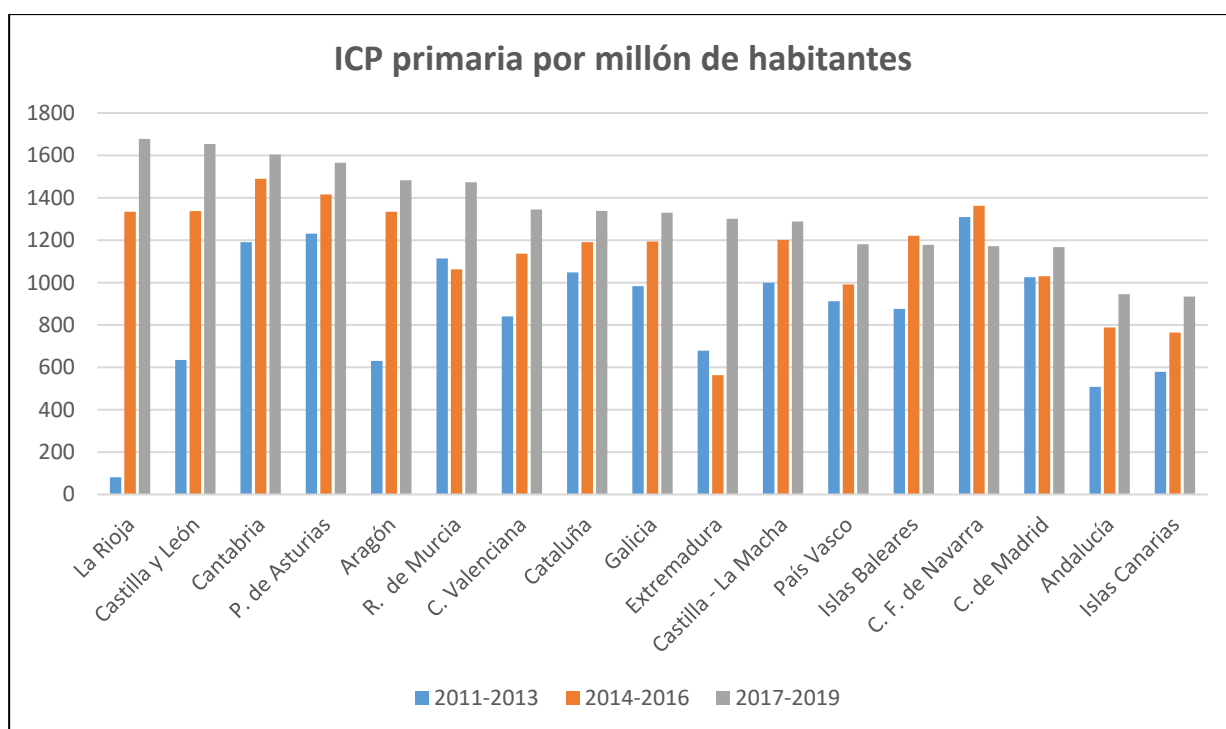

**Figura 4 del material adicional.** Desfibriladores automáticos implantables (DAI) por millón de habitantes/trienio en los distintos periodos temporales.

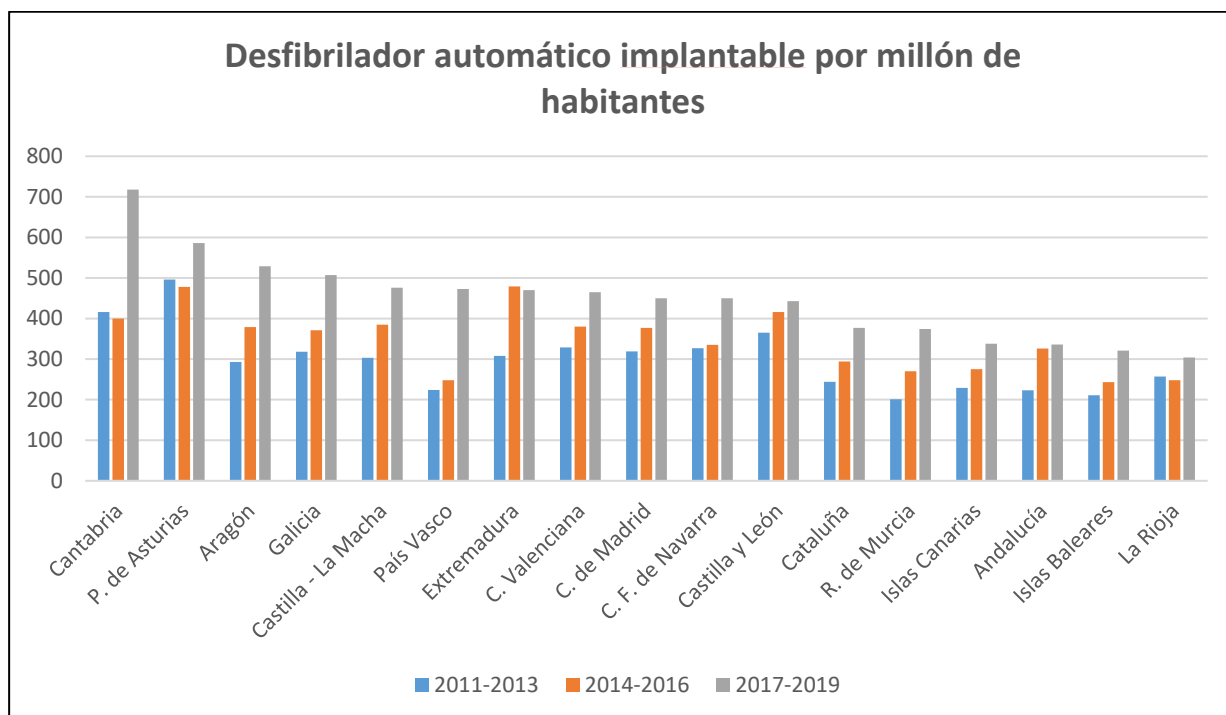

**Figura 5 del material adicional.** Sistemas de terapia de resincronización cardiaca (TRC) por millón de habitantes/trienio en los distintos periodos temporales.

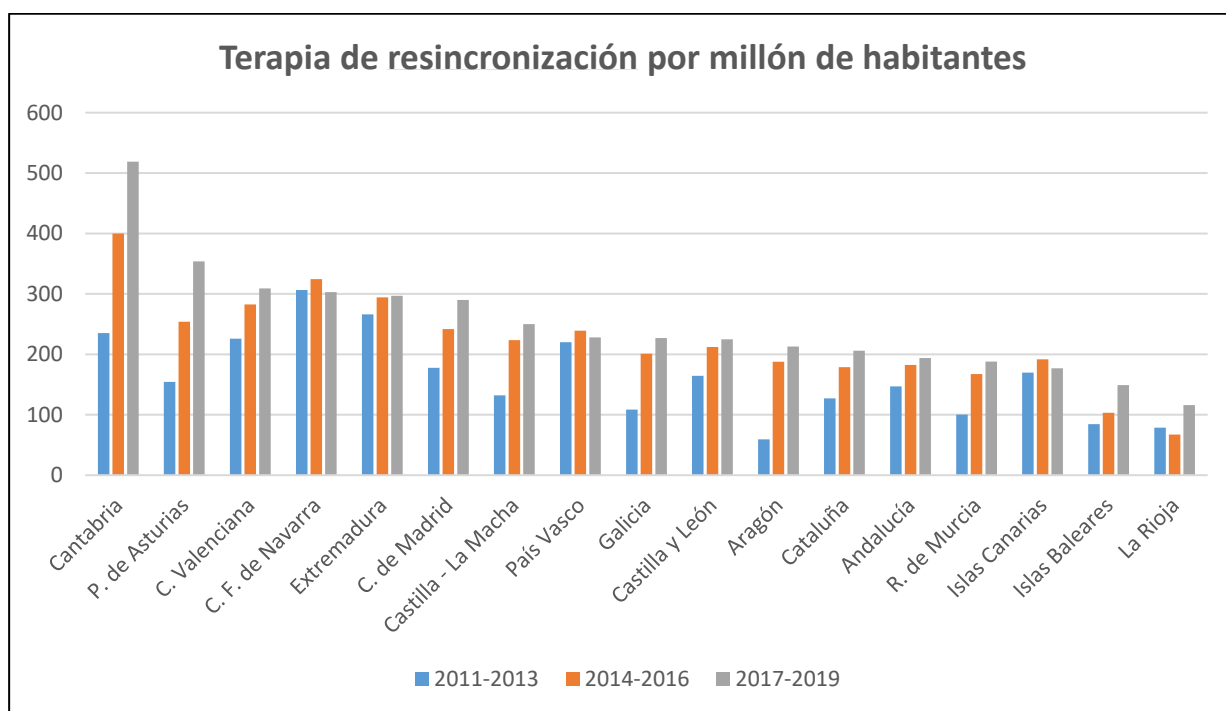

**Figura 6 del material adicional.** Implantes de prótesis valvular aórtica percutánea (TAVI) y cirugía de sustitución valvular aórtica (SVAo) por millón de habitantes/año en el periodo 2017-2018.

\*La Rioja no aporta implantes en el periodo.

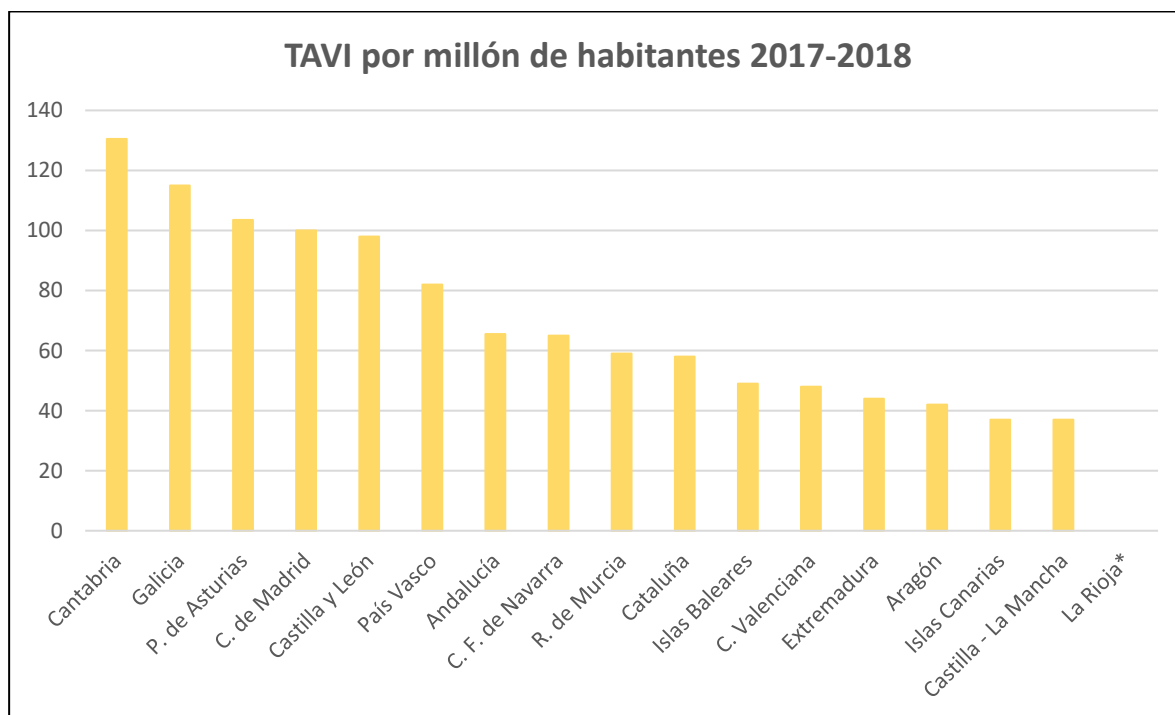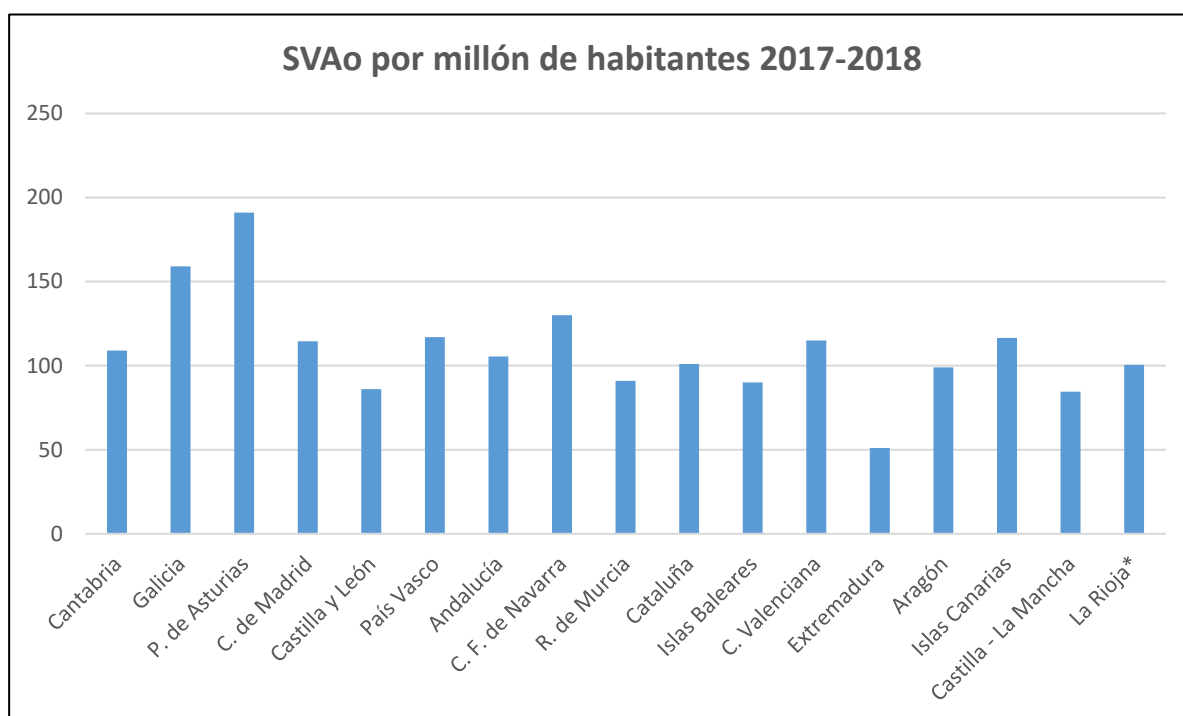

**Figura 7 del material adicional.** Promedio de producto interior bruto (PIB) y gasto sanitario per cápita en los distintos periodos temporales.

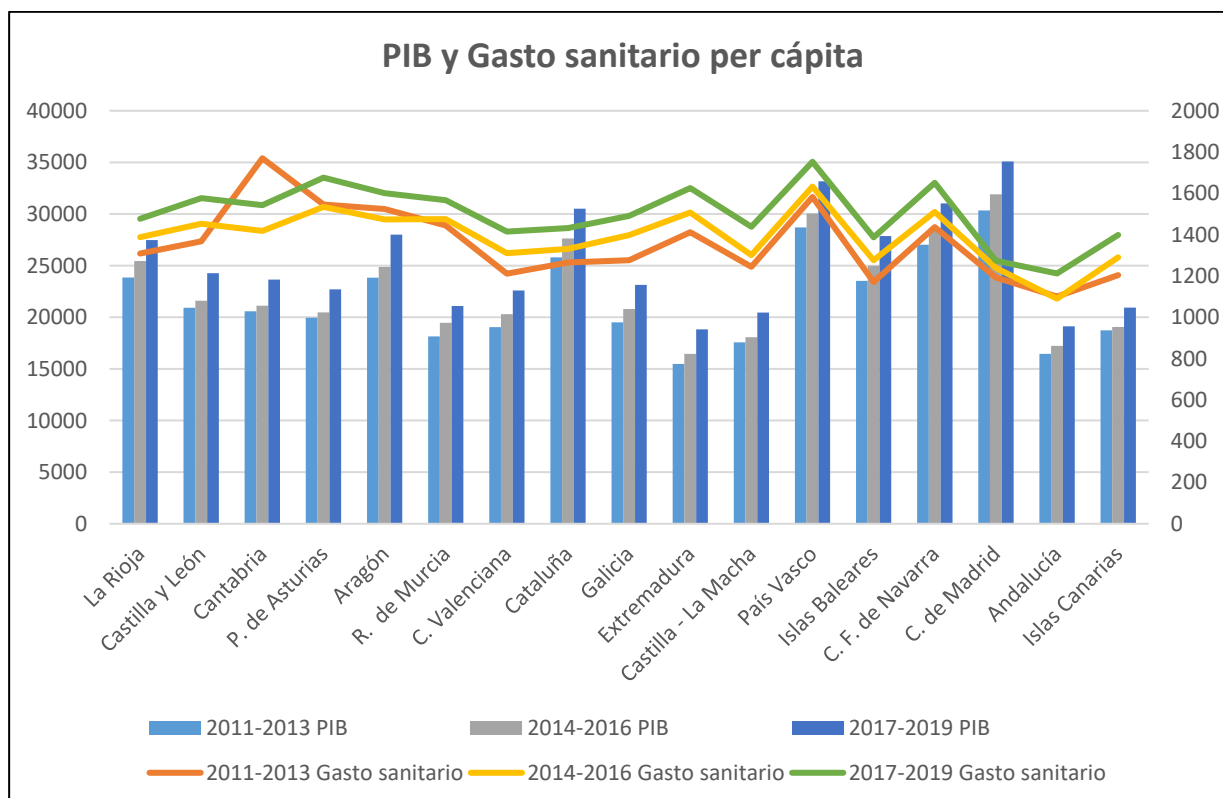

**Figura 8 del material adicional.** Valores promedio de la frecuentación (ingresos por 100.000 habitantes y año) para cardiología general, para infarto de miocardio y para insuficiencia cardiaca en los periodos temporales.

\*En el último periodo 2017-2019 los datos de frecuentación de infarto de miocardio no son concordantes con los periodos previos ya que en estos se recoge infarto en general, con y sin elevación del ST, mientras que en 2017 y 2018 son datos de frecuentación solo para infarto con elevación del ST.

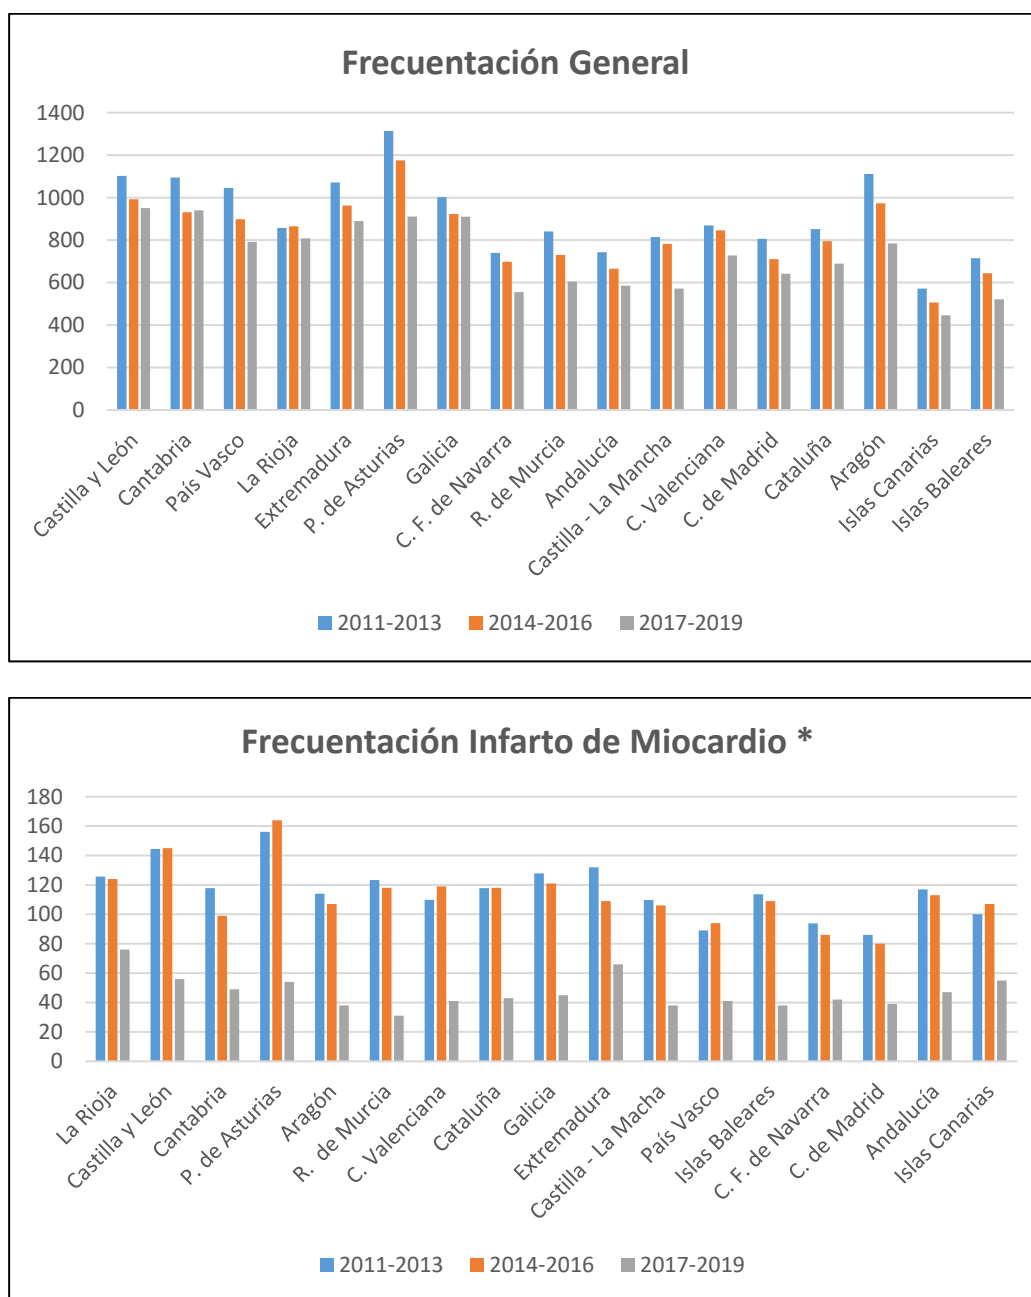

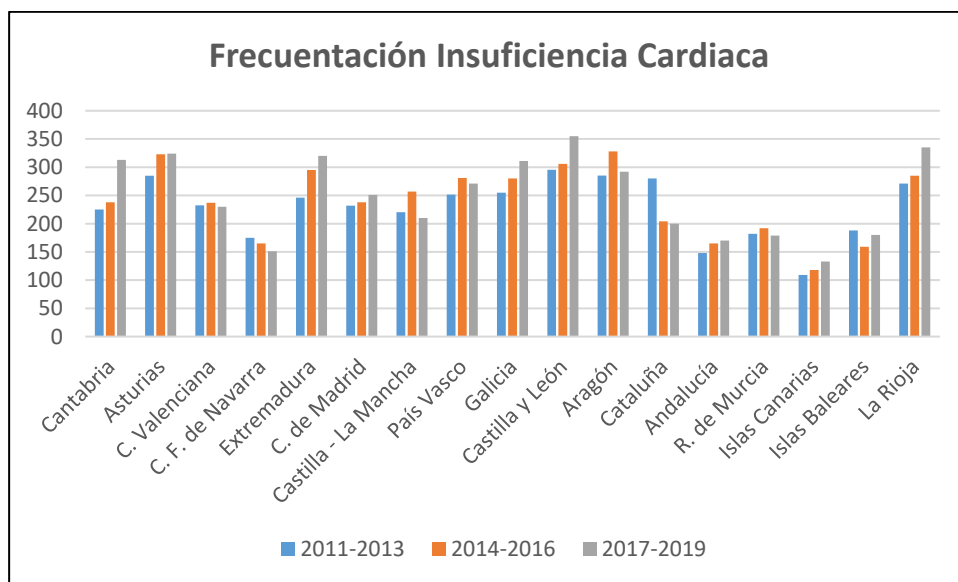

**Figura 9 del material adicional.** Valores promedio de la razón de mortalidad estandarizada por riesgo (RAMER) con ajuste multinivel para cardiología en general, para infarto de miocardio y para insuficiencia cardiaca en los periodos temporales.

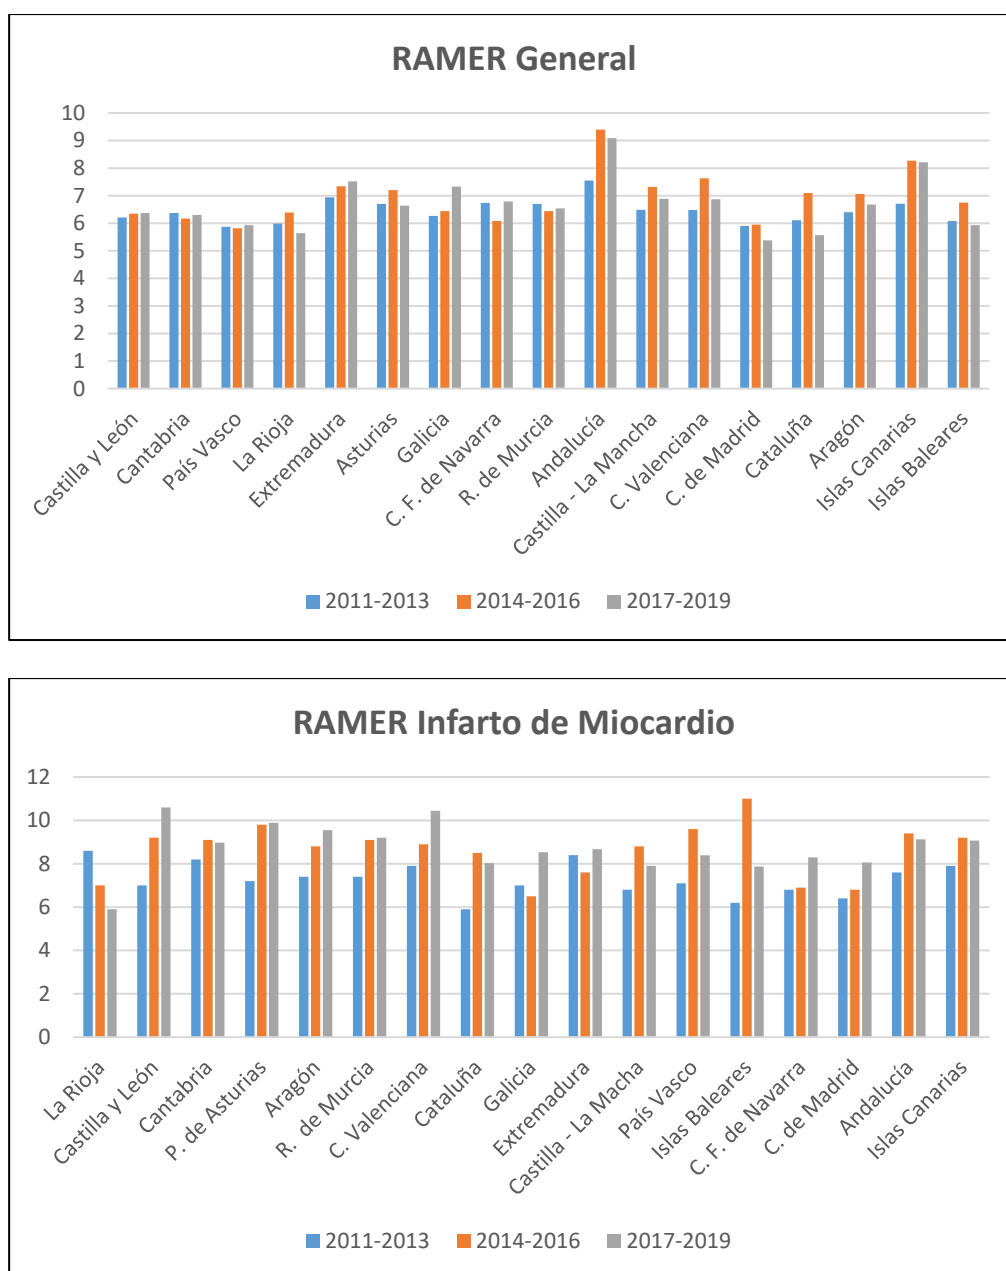

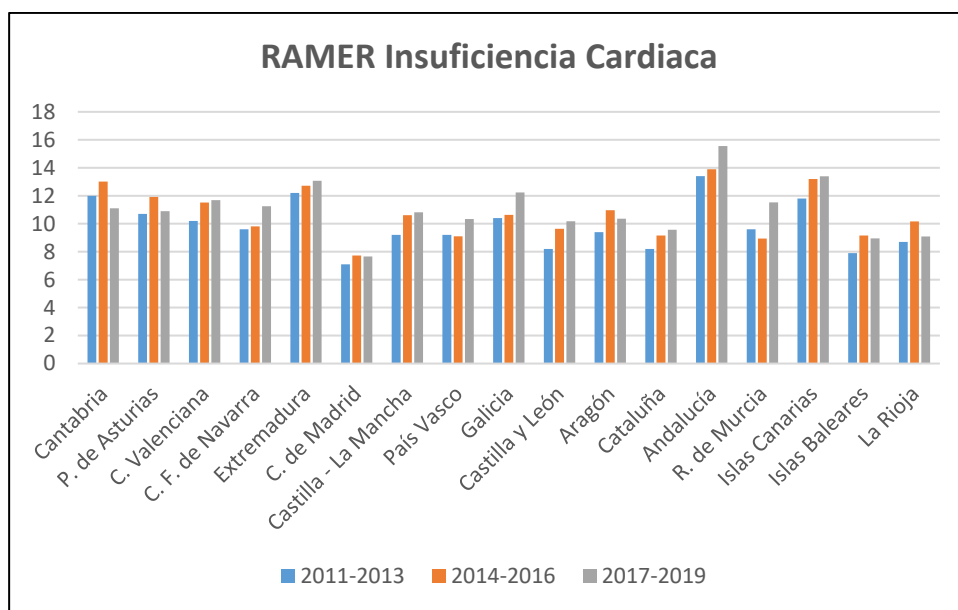

**Figura 10 del material adicional.** Clases de recomendaciones para las técnicas respaldadas por las guías clínicas de la Sociedad Europea de Cardiología durante el periodo de estudio. Consultar las guías para información más detallada (referencias 33-40 del artículo). DAI: desfibrilador automático implantable; ICPp: intervención coronaria percutánea primaria; TAVI: implante percutáneo de prótesis valvular aórtica; TRC: terapia de resincronización.

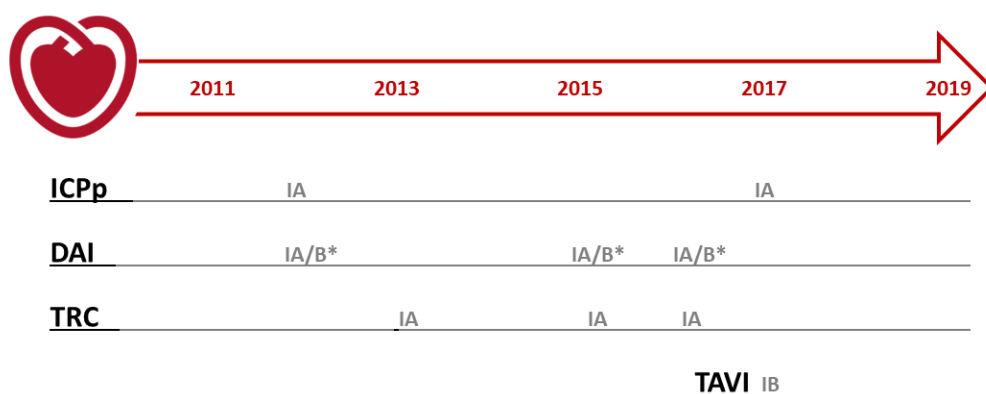

Supplement: mmc1 [file S0300893222000537:mmc1.pdf]
